# Supplementary figures and images for: Analyzing Gait in the Real World Using Wearable Movement Sensors and Frequently Repeated Movement Paths
Source: MDPI journal article supplement (doi:10.3390/s19081925), 2019-04-24

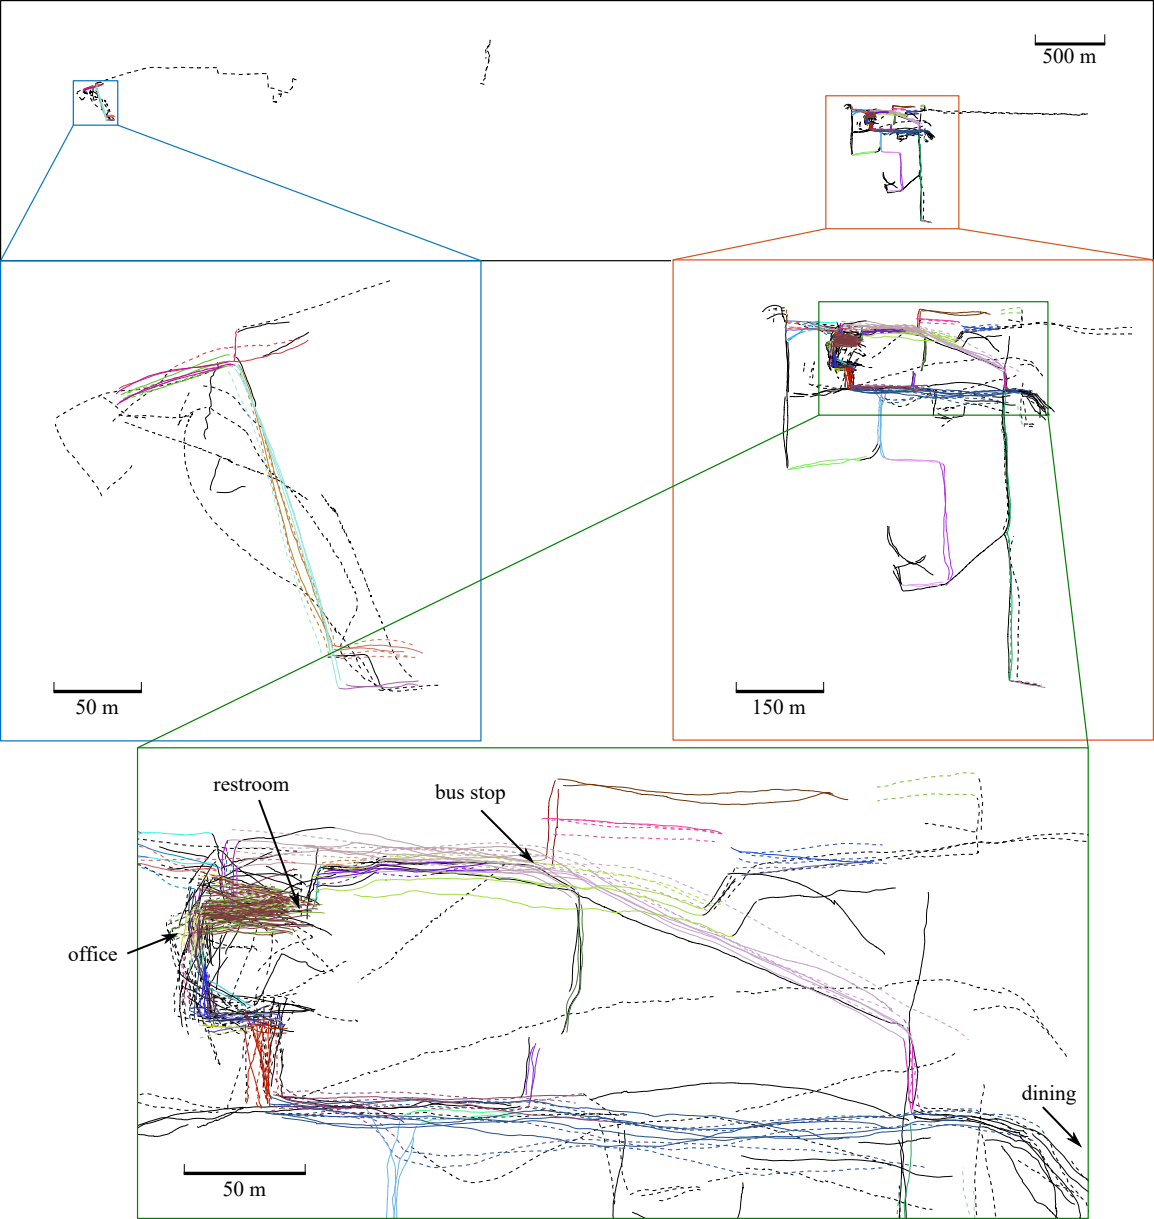

Supplement: s1 [file s1]
